# Supplementary material
Source: publisher figshare collection journal article supplement (https://rs.figshare.com/ndownloader/files/12440147)
Supplement: Supplementary file 1 [file 12440147]

## Sheet: Experiment 1
id	trial	block	condition	pupil_diameter (mm)	response_speed (s^-1)
1	1	1	baseline	4.9917	4.30824
1	1	2	postred	5.50267	4.2474
1	2	1	baseline	6.2409	4.53579
1	2	2	postblue	3.83856	4.61595
2	1	1	baseline	3.51766	3.40492
2	1	2	postred	3.9258	3.12215
2	2	1	baseline	3.10973	3.14628
2	2	2	postblue	2.69975	3.66303
3	1	1	baseline	6.136	4.3357
3	1	2	postred	6.55538	4.15094
3	2	1	baseline	6.23959	4.51425
3	2	2	postblue	3.34458	4.73187
4	1	1	baseline	4.65391	4.12636
4	1	2	postred	6.08502	4.07525
4	2	1	baseline	4.61811	4.00673
4	2	2	postblue	2.8606	4.12858
5	1	1	baseline	6.29693	3.95539
5	1	2	postred	7.08065	4.1004
5	2	1	baseline	6.31903	3.76804
5	2	2	postblue	3.86504	4.09383
6	1	1	baseline	4.85253	3.83837
6	1	2	postred	5.66679	3.76168
6	2	1	baseline	4.43291	3.86203
6	2	2	postblue	3.31167	3.81612
7	1	1	baseline	5.76548	4.69157
7	1	2	postblue	4.01405	4.62233
7	2	1	baseline	4.84083	5.06869
7	2	2	postred	7.63664	4.94812
8	1	1	baseline	5.29292	3.42602
8	1	2	postblue	2.93328	3.80121
8	2	1	baseline	5.5685	3.31644
8	2	2	postred	5.88849	3.50279
9	1	1	baseline	6.5247	4.74211
9	1	2	postblue	2.63004	4.59998
9	2	1	baseline	6.80309	4.71974
9	2	2	postred	6.42361	4.65039
10	1	1	baseline	7.18731	4.72416
10	1	2	postblue	3.24075	4.51069
10	2	1	baseline	7.16489	4.58185
10	2	2	postred	7.0136	4.43214
11	1	1	baseline	6.20887	4.30972
11	1	2	postblue	5.73224	4.28105
11	2	1	baseline	6.44748	4.7633
11	2	2	postred	6.15233	4.40634
12	1	1	baseline	6.31216	3.33539
12	1	2	postblue	3.79033	3.2513
12	2	1	baseline	6.62096	3.35301
12	2	2	postred	6.97963	3.15329

## Sheet: Pupil diameter red light
id	time (s)	pupil diameter (mm)
1	1	NA
1	2	NA
1	3	NA
1	4	NA
1	5	NA
1	6	NA
1	7	NA
1	8	NA
1	9	NA
1	10	4.54275
1	11	4.69406
1	12	4.69406
1	13	4.69406
1	14	4.69406
1	15	4.69406
1	16	4.69406
1	17	4.69406
1	18	4.69406
1	19	4.69406
1	20	4.69406
1	21	4.64552
1	22	4.75939
1	23	4.61481
1	24	4.65061
1	25	4.65061
1	26	4.65061
1	27	4.65061
1	28	4.65061
1	29	4.65061
1	30	4.65061
1	31	4.65061
1	32	4.65061
1	33	4.65061
1	34	4.65613
1	35	4.85106
1	36	5.02152
1	37	5.02152
1	38	5.02152
1	39	5.02152
1	40	5.02152
1	41	5.02152
1	42	5.00887
1	43	4.97472
1	44	5.02236
1	45	4.63852
1	46	4.34613
1	47	4.34613
1	48	4.34613
1	49	4.34613
1	50	4.34613
1	51	4.34613
1	52	4.34613
1	53	4.34613
1	54	4.34613
1	55	4.34613
1	56	4.34613
1	57	4.34563
1	58	4.22831
1	59	4.45652
1	60	4.69762
1	61	4.77761
1	62	4.77761
1	63	4.77761
1	64	4.77761
1	65	4.77761
1	66	4.77761
1	67	4.77761
1	68	4.77761
1	69	4.77761
1	70	4.77761
1	71	4.77761
1	72	4.77761
1	73	4.77761
1	74	4.77761
1	75	4.77761
1	76	4.77761
1	77	4.77761
1	78	4.77761
1	79	4.77761
1	80	4.77761
1	81	4.77761
1	82	4.77761
1	83	4.76913
1	84	4.7041
1	85	4.58607
1	86	4.55867
1	87	4.7277
1	88	4.7277
1	89	4.7277
1	90	4.7277
1	91	4.7277
1	92	4.7277
1	93	4.75348
1	94	5.37197
1	95	5.37197
1	96	5.37197
1	97	5.37197
1	98	5.37197
1	99	5.37702
1	100	5.3972
1	101	5.3972
1	102	5.46118
1	103	5.11853
1	104	5.00077
1	105	5.00077
1	106	5.00077
1	107	5.00077
1	108	5.00077
1	109	5.00077
1	110	5.00077
1	111	5.00077
1	112	5.00077
1	113	5.00077
1	114	5.00077
1	115	5.00077
1	116	5.00077
1	117	4.90385
1	118	4.79275
1	119	4.91511
1	120	5.2027
1	121	5.49917
1	122	4.92303
1	123	4.84125
1	124	4.88238
1	125	4.99123
1	126	4.95283
1	127	4.95283
1	128	4.95283
1	129	4.95283
1	130	4.95283
1	131	4.95283
1	132	4.95283
1	133	4.95283
1	134	4.95283
1	135	4.95283
1	136	4.95283
1	137	4.95283
1	138	4.95283
1	139	4.95283
1	140	4.95283
1	141	4.95283
1	142	4.95283
1	143	4.95283
1	144	4.95283
1	145	4.95283
1	146	4.95283
1	147	4.95283
1	148	4.95283
1	149	4.95283
1	150	4.95283
1	151	4.95283
1	152	4.95283
1	153	4.95283
1	154	4.95283
1	155	4.95283
1	156	4.95283
1	157	4.95283
1	158	4.95283
1	159	4.95283
1	160	4.95283
1	161	4.95283
1	162	4.95283
1	163	4.95283
1	164	4.95283
1	165	4.95283
1	166	4.95283
1	167	4.95283
1	168	4.95283
1	169	4.95283
1	170	4.95283
1	171	4.95283
1	172	4.95283
1	173	4.78853
1	174	4.60331
1	175	4.66081
1	176	4.46345
1	177	4.60929
1	178	4.56257
1	179	4.56257
1	180	4.56257
1	181	4.56257
1	182	4.56257
1	183	4.56257
1	184	4.56257
1	185	4.56257
1	186	4.56257
1	187	4.56257
1	188	4.56257
1	189	4.56257
1	190	4.56257
1	191	4.56257
1	192	4.6881
1	193	5.60859
1	194	5.60859
1	195	5.60859
1	196	5.60859
1	197	5.60859
1	198	5.60859
1	199	5.60859
1	200	5.60859
1	201	5.60859
1	202	5.60859
1	203	5.60859
1	204	5.60859
1	205	5.60859
1	206	5.60859
1	207	5.60859
1	208	5.60859
1	209	5.60859
1	210	5.60859
1	211	5.60859
1	212	5.60859
1	213	5.60859
1	214	5.60859
1	215	5.60859
1	216	5.60859
1	217	5.60859
1	218	5.72541
1	219	5.80288
1	220	5.4991
1	221	4.56229
1	222	4.56229
1	223	4.56229
1	224	4.56229
1	225	4.56229
1	226	4.56229
1	227	4.56229
1	228	4.56229
1	229	4.56229
1	230	4.56229
1	231	4.56229
1	232	4.58722
1	233	4.5608
1	234	4.58184
1	235	5.1391
1	236	5.40702
1	237	5.40702
1	238	5.40702
1	239	5.40702
1	240	5.40702
1	241	5.40702
1	242	5.40702
1	243	5.40702
1	244	5.40702
1	245	5.40702
1	246	5.40702
1	247	5.40702
1	248	5.40702
1	249	5.40702
1	250	5.40702
1	251	5.40943
1	252	5.21046
1	253	5.33206
1	254	5.56149
1	255	5.56149
1	256	5.56149
1	257	5.56149
1	258	5.56149
1	259	5.56149
1	260	5.56149
1	261	5.56149
1	262	5.56149
1	263	5.56149
1	264	5.56149
1	265	5.28604
1	266	4.93545
1	267	4.93545
1	268	4.93545
1	269	4.93545
1	270	4.93545
1	271	4.93545
1	272	4.93545
1	273	4.93545
1	274	4.93545
1	275	4.93545
1	276	4.93545
1	277	5.07411
1	278	5.25058
1	279	5.25058
1	280	5.25058
1	281	5.25058
1	282	5.25058
1	283	5.25058
1	284	5.25058
1	285	5.25058
1	286	5.23712
1	287	NA
1	288	NA
1	289	NA
1	290	NA
1	291	NA
1	292	NA
1	293	NA
1	294	NA
1	295	NA
1	296	NA
1	297	NA
1	298	NA
1	299	NA
1	300	NA
1	301	NA
1	302	NA
1	303	NA
1	304	NA
1	305	NA
1	306	NA
1	307	NA
1	308	NA
1	309	NA
1	310	NA
1	311	NA
1	312	NA
1	313	NA
1	314	NA
1	315	NA
1	316	NA
1	317	NA
1	318	NA
1	319	NA
1	320	NA
1	321	NA
1	322	NA
1	323	NA
1	324	NA
1	325	NA
1	326	NA
1	327	NA
1	328	NA
1	329	NA
1	330	NA
1	331	NA
1	332	NA
1	333	NA
1	334	NA
1	335	NA
1	336	NA
1	337	NA
1	338	NA
1	339	NA
1	340	2.83403
1	341	2.83505
1	342	2.78818
1	343	2.78818
1	344	2.78818
1	345	2.78818
1	346	2.79907
1	347	3.01611
1	348	3.01611
1	349	3.01611
1	350	3.01611
1	351	3.01611
1	352	3.01611
1	353	3.01611
1	354	3.01611
1	355	3.01611
1	356	3.01611
1	357	3.01611
1	358	3.01611
1	359	3.01611
1	360	3.01611
1	361	3.01611
1	362	3.01611
1	363	3.01611
1	364	3.10654
1	365	3.11031
1	366	3.11031
1	367	3.11031
1	368	2.9576
1	369	2.93172
1	370	2.93172
1	371	2.93172
1	372	2.75236
1	373	2.52408
1	374	2.52408
1	375	2.52408
1	376	2.52408
1	377	2.52408
1	378	2.52408
1	379	2.52408
1	380	2.52408
1	381	2.52408
1	382	2.52971
1	383	2.60762
1	384	2.60762
1	385	2.60762
1	386	2.52514
1	387	2.56678
1	388	2.50585
1	389	2.50484
1	390	2.42679
1	391	2.42679
1	392	2.59814
1	393	2.74013
1	394	2.86657
1	395	3.0711
1	396	3.04486
1	397	2.95653
1	398	2.86142
1	399	2.83922
1	400	2.78119
1	401	2.94658
1	402	2.88666
1	403	2.96129
1	404	2.90035
1	405	3.06826
1	406	3.10914
1	407	2.93577
1	408	3.06264
1	409	3.10513
1	410	3.23247
1	411	3.27174
1	412	3.15622
1	413	3.05764
1	414	3.11152
1	415	3.14031
1	416	3.09785
1	417	3.07663
1	418	2.96984
1	419	2.98406
1	420	3.05157
1	421	3.08227
1	422	3.0984
1	423	3.15373
1	424	2.65505
1	425	2.59792
1	426	2.56017
1	427	2.88167
1	428	3.25694
1	429	3.26393
1	430	3.2503
1	431	3.27777
1	432	3.22474
1	433	3.13289
1	434	3.10394
1	435	3.0076
1	436	3.14902
1	437	3.05207
1	438	3.12613
1	439	3.1513
1	440	3.21121
1	441	3.32292
1	442	3.29669
1	443	3.40142
1	444	3.36115
1	445	3.37495
1	446	3.18851
1	447	3.24498
1	448	3.06642
1	449	2.94282
1	450	3.00405
1	451	3.08845
1	452	3.09593
1	453	3.10862
1	454	3.22366
1	455	3.3497
1	456	3.33294
1	457	3.34782
1	458	3.40852
1	459	3.24451
1	460	3.20993
1	461	3.19071
1	462	3.19071
1	463	3.03677
1	464	3.05267
1	465	2.94272
1	466	3.04841
1	467	3.29366
1	468	3.29955
1	469	3.2998
1	470	3.27722
1	471	3.22527
1	472	3.32924
1	473	3.13978
1	474	3.26047
1	475	3.27667
1	476	3.26804
1	477	3.37768
1	478	3.40892
1	479	3.56954
1	480	3.30938
1	481	3.23335
1	482	3.22176
1	483	3.3248
1	484	3.61451
1	485	3.45567
1	486	3.53086
1	487	3.38163
1	488	3.17171
1	489	3.50023
1	490	3.27717
1	491	3.13283
1	492	3.24024
1	493	3.43898
1	494	3.54959
1	495	3.05564
1	496	3.05564
1	497	3.11678
1	498	3.34758
1	499	3.29785
1	500	3.48541
1	501	3.25093
1	502	3.2005
1	503	3.2093
1	504	3.34238
1	505	3.4909
1	506	3.30435
1	507	3.47209
1	508	3.38249
1	509	3.09153
1	510	3.25972
1	511	3.19776
1	512	3.30178
1	513	3.30644
1	514	3.40237
1	515	3.21082
1	516	3.19386
1	517	3.19386
1	518	3.19386
1	519	3.19386
1	520	3.1984
1	521	3.31909
1	522	3.10342
1	523	2.97966
1	524	3.1934
1	525	3.24769
1	526	3.01997
1	527	2.96013
1	528	2.88797
1	529	3.1669
1	530	3.27709
1	531	3.32813
1	532	3.49832
1	533	3.43805
1	534	3.43805
1	535	3.02511
1	536	3.09682
1	537	3.13888
1	538	3.14408
1	539	3.16885
1	540	2.96865
1	541	2.8737
1	542	2.69035
1	543	2.74604
1	544	2.91225
1	545	2.89802
1	546	2.82955
1	547	3.10157
1	548	3.04015
1	549	3.04899
1	550	2.93312
1	551	2.93312
1	552	2.96785
1	553	3.2705
1	554	3.21459
1	555	3.18118
1	556	3.34029
1	557	3.0815
1	558	3.20105
1	559	3.11366
1	560	3.19321
1	561	3.24581
1	562	2.80655
1	563	2.71014
1	564	2.69622
1	565	2.73759
1	566	3.13441
1	567	3.14844
1	568	3.19662
1	569	3.24848
1	570	3.36326
1	571	3.40525
1	572	3.3963
1	573	3.52107
1	574	3.47324
1	575	3.12013
1	576	3.07391
1	577	3.00988
1	578	3.03443
1	579	3.03564
1	580	2.84574
1	581	2.88807
1	582	3.32142
1	583	3.32142
1	584	3.03364
1	585	3.01207
1	586	3.23535
1	587	3.16147
1	588	3.00747
1	589	2.98823
1	590	3.32966
1	591	3.22193
1	592	3.12187
1	593	3.25547
1	594	3.06862
1	595	2.96825
1	596	3.23676
1	597	3.27792
1	598	2.99125
1	599	3.22676
1	600	3.26188
1	601	2.9415
1	602	3.47008
1	603	3.83056
1	604	4.49502
1	605	4.99545
1	606	4.99545
1	607	4.98847
1	608	4.90826
1	609	4.90826
1	610	4.96942
1	611	5.14877
1	612	5.24829
1	613	5.06871
1	614	4.9267
1	615	4.48569
1	616	4.86785
1	617	4.89256
1	618	4.89256
1	619	4.89256
1	620	4.89256
1	621	4.89256
1	622	4.89256
1	623	4.89256
1	624	4.89256
1	625	4.89256
1	626	4.89256
1	627	4.89297
1	628	4.96627
1	629	5.12901
1	630	5.05068
1	631	5.05068
1	632	5.05068
1	633	5.05068
1	634	5.05068
1	635	5.05068
1	636	5.05068
1	637	5.05068
1	638	4.82182
1	639	5.03814
1	640	5.3201
1	641	5.3201
1	642	5.3201
1	643	5.3201
1	644	5.36238
1	645	5.4258
1	646	5.4258
1	647	5.4258
1	648	5.31507
1	649	5.00755
1	650	5.02686
1	651	4.84385
1	652	4.69775
1	653	4.79381
1	654	4.79702
1	655	4.88971
1	656	5.02222
1	657	4.94218
1	658	5.08316
1	659	5.5586
1	660	5.6613
1	661	5.6613
1	662	5.6613
1	663	5.6408
1	664	5.63448
1	665	5.79432
1	666	5.81174
1	667	5.83047
1	668	5.80388
1	669	6.02239
1	670	5.97923
1	671	5.97923
1	672	5.97923
1	673	5.97923
1	674	5.97923
1	675	5.97923
1	676	5.97923
1	677	5.97923
1	678	5.97923
1	679	5.98156
1	680	6.0107
1	681	5.92559
1	682	5.95345
1	683	5.96465
1	684	5.97246
1	685	5.87732
1	686	5.67322
1	687	5.77457
1	688	5.77457
1	689	5.77457
1	690	5.77457
1	691	5.77457
1	692	5.78
1	693	5.37596
1	694	5.35758
1	695	5.07675
1	696	5.07675
1	697	5.07675
1	698	5.07675
1	699	5.07675
1	700	5.07675
1	701	5.04688
1	702	4.99405
1	703	4.99405
1	704	5.15511
1	705	5.44206
1	706	5.44206
1	707	5.47704
1	708	5.7154
1	709	5.78298
1	710	5.78298
1	711	5.78298
1	712	5.78298
1	713	5.75061
1	714	5.65233
1	715	5.65233
1	716	5.58937
1	717	5.4129
1	718	5.41629
1	719	5.54075
1	720	5.5585
1	721	5.72077
1	722	5.85413
1	723	5.70579
1	724	5.35192
1	725	5.30272
1	726	5.30272
1	727	5.31852
1	728	5.40402
1	729	5.46456
1	730	5.38105
1	731	5.02937
1	732	5.02937
1	733	5.02937
1	734	5.02937
1	735	5.24442
1	736	5.25338
1	737	5.25321
1	738	5.19057
1	739	5.08698
1	740	4.9864
1	741	4.66296
1	742	5.09357
1	743	5.12285
1	744	4.95436
1	745	4.85639
1	746	4.85639
1	747	4.85639
1	748	4.85639
1	749	5.17027
1	750	5.48972
1	751	5.48972
1	752	5.48972
1	753	5.42014
1	754	5.1418
1	755	5.1418
1	756	5.05796
1	757	5.06333
1	758	5.41771
1	759	5.75812
1	760	5.7312
1	761	5.72868
1	762	5.87593
1	763	5.85587
1	764	5.85587
1	765	5.85587
1	766	5.85587
1	767	5.85587
1	768	5.81223
1	769	5.54972
1	770	5.54972
1	771	5.37458
1	772	5.16142
1	773	5.16142
1	774	5.20389
1	775	5.3131
1	776	5.48777
1	777	5.73729
1	778	5.69684
1	779	5.90718
1	780	5.90718
1	781	5.06569
1	782	4.85078
1	783	5.13152
1	784	5.36468
1	785	5.36468
1	786	5.36468
1	787	5.36468
1	788	5.36468
1	789	5.36468
1	790	5.36468
1	791	5.36468
1	792	5.36468
1	793	5.22658
1	794	5.69685
1	795	5.89484
1	796	5.89484
1	797	5.89484
1	798	5.89484
1	799	5.89484
1	800	5.83338
1	801	5.86512
1	802	5.86512
1	803	5.44928
1	804	5.41178
1	805	5.41178
1	806	5.41178
1	807	5.44408
1	808	5.37261
1	809	5.08656
1	810	5.08656
1	811	5.08656
1	812	5.08656
1	813	5.08656
1	814	5.08656
1	815	5.23301
1	816	5.54832
1	817	5.5448
1	818	5.57972
1	819	5.9238
1	820	5.81856
1	821	5.3896
1	822	5.1132
1	823	5.21752
1	824	5.52168
1	825	5.52168
1	826	5.52168
1	827	5.52168
1	828	5.52168
1	829	5.55071
1	830	5.48507
1	831	5.469
1	832	5.2874
1	833	5.3087
1	834	5.5512
1	835	5.70061
1	836	5.81922
1	837	5.92063
1	838	5.85733
1	839	5.94826
1	840	5.97523
1	841	5.98708
1	842	5.98708
1	843	5.94351
1	844	5.65472
1	845	5.5071
1	846	5.5071
1	847	5.5071
1	848	5.5071
1	849	5.5071
1	850	5.5071
1	851	5.5071
1	852	5.5071
1	853	5.5071
1	854	5.5071
1	855	5.50921
1	856	5.55981
1	857	5.55981
1	858	5.55981
1	859	5.53886
1	860	5.46758
1	861	5.44924
1	862	5.54669
1	863	5.63561
1	864	5.83578
1	865	5.75382
1	866	5.76768
1	867	5.80416
1	868	5.59542
1	869	5.46023
1	870	5.50211
1	871	5.25776
1	872	5.23684
1	873	5.26244
1	874	5.24519
1	875	5.31619
1	876	5.15969
1	877	5.50491
1	878	5.65615
1	879	5.50381
1	880	5.29207
1	881	5.29831
1	882	5.29087
1	883	5.0975
1	884	4.95449
1	885	4.75013
1	886	4.75013
1	887	4.75013
1	888	4.75013
1	889	4.991
1	890	5.24073
1	891	5.53455
1	892	5.70643
1	893	5.6411
1	894	5.57202
1	895	5.55168
1	896	5.55168
1	897	5.55168
1	898	NA
1	899	NA
1	900	NA
1	901	NA
2	1	4.05042
2	2	4.2637
2	3	4.2446
2	4	4.33861
2	5	4.3542
2	6	4.04748
2	7	3.86946
2	8	3.23566
2	9	3.39512
2	10	3.6132
2	11	3.81255
2	12	3.92746
2	13	4.13356
2	14	4.14147
2	15	4.17964
2	16	3.96305
2	17	3.96337
2	18	4.08993
2	19	4.13584
2	20	4.23619
2	21	4.36028
2	22	4.11216
2	23	3.8426
2	24	4.09248
2	25	4.10827
2	26	3.90405
2	27	3.54456
2	28	3.56279
2	29	3.3531
2	30	3.38904
2	31	3.53292
2	32	3.39117
2	33	3.36011
2	34	3.36748
2	35	3.28177
2	36	3.12861
2	37	3.16518
2	38	3.27676
2	39	3.41966
2	40	3.29152
2	41	3.2637
2	42	3.2193
2	43	3.0146
2	44	2.65124
2	45	2.45349
2	46	2.66697
2	47	3.1052
2	48	3.14092
2	49	3.10631
2	50	3.15262
2	51	3.01149
2	52	3.39244
2	53	3.36811
2	54	3.25807
2	55	3.36539
2	56	3.42241
2	57	3.33396
2	58	3.24117
2	59	2.98258
2	60	2.98057
2	61	3.0136
2	62	3.06974
2	63	3.02383
2	64	3.48747
2	65	3.72174
2	66	3.91714
2	67	4.04624
2	68	4.43383
2	69	4.47229
2	70	4.4709
2	71	4.44685
2	72	4.42192
2	73	4.38885
2	74	4.25155
2	75	4.12716
2	76	4.05067
2	77	3.57374
2	78	3.57374
2	79	3.51694
2	80	3.26205
2	81	3.43059
2	82	3.69558
2	83	3.50337
2	84	3.51398
2	85	3.7421
2	86	4.32664
2	87	4.80396
2	88	4.79068
2	89	4.6492
2	90	4.64584
2	91	4.6763
2	92	4.54472
2	93	4.2573
2	94	3.75716
2	95	3.83009
2	96	3.64036
2	97	3.90408
2	98	3.30666
2	99	2.64769
2	100	2.36934
2	101	2.90001
2	102	3.41734
2	103	3.4252
2	104	2.95969
2	105	2.79468
2	106	2.64203
2	107	2.91428
2	108	3.10281
2	109	2.51727
2	110	2.24099
2	111	2.79519
2	112	2.8616
2	113	3.06626
2	114	3.20074
2	115	3.17369
2	116	3.38252
2	117	3.34721
2	118	2.87103
2	119	2.61485
2	120	2.73974
2	121	2.72902
2	122	2.72902
2	123	2.72902
2	124	2.7898
2	125	3.25544
2	126	3.32825
2	127	3.26142
2	128	3.22763
2	129	3.21963
2	130	3.44756
2	131	3.71725
2	132	3.89982
2	133	3.95083
2	134	4.10124
2	135	4.27034
2	136	3.8864
2	137	3.38226
2	138	3.36752
2	139	3.21732
2	140	3.62248
2	141	4.10224
2	142	4.51732
2	143	4.56479
2	144	4.26024
2	145	4.33572
2	146	4.32361
2	147	4.38938
2	148	3.8686
2	149	3.47731
2	150	3.48673
2	151	3.907
2	152	3.81271
2	153	3.65404
2	154	2.98747
2	155	2.50398
2	156	2.73189
2	157	2.68407
2	158	2.70788
2	159	3.21926
2	160	3.56993
2	161	3.6511
2	162	3.39281
2	163	2.92127
2	164	2.98263
2	165	3.59387
2	166	3.6218
2	167	3.4788
2	168	2.9713
2	169	2.54813
2	170	2.51557
2	171	2.79643
2	172	2.79825
2	173	2.80659
2	174	2.87034
2	175	3.18142
2	176	3.68954
2	177	3.90317
2	178	3.47637
2	179	3.07686
2	180	3.2149
2	181	3.40082
2	182	3.58232
2	183	3.43776
2	184	3.58488
2	185	3.0427
2	186	2.66725
2	187	2.96309
2	188	3.51335
2	189	3.67011
2	190	3.82072
2	191	4.02367
2	192	4.05525
2	193	3.80597
2	194	3.66469
2	195	3.60945
2	196	3.05636
2	197	2.48691
2	198	2.33186
2	199	2.67492
2	200	2.69818
2	201	3.12954
2	202	3.42294
2	203	3.42339
2	204	3.00576
2	205	2.89509
2	206	2.94142
2	207	3.18907
2	208	3.18432
2	209	3.15723
2	210	3.2833
2	211	3.6575
2	212	4.13113
2	213	4.28773
2	214	4.41212
2	215	4.54013
2	216	4.46825
2	217	4.19854
2	218	3.89618
2	219	3.48767
2	220	3.38012
2	221	3.49707
2	222	3.39205
2	223	3.40647
2	224	3.72066
2	225	4.16934
2	226	4.17052
2	227	4.00216
2	228	3.96404
2	229	3.53315
2	230	2.88611
2	231	2.63738
2	232	2.86722
2	233	3.20031
2	234	3.68105
2	235	3.938
2	236	4.12611
2	237	4.2017
2	238	4.43028
2	239	4.67651
2	240	4.74078
2	241	4.79874
2	242	4.63219
2	243	4.42781
2	244	4.58085
2	245	4.71817
2	246	4.84632
2	247	4.64531
2	248	4.63388
2	249	4.70522
2	250	4.83297
2	251	4.62054
2	252	3.8414
2	253	3.75421
2	254	3.72147
2	255	3.78119
2	256	4.12745
2	257	3.8609
2	258	3.80263
2	259	4.07258
2	260	4.41846
2	261	4.35153
2	262	4.31386
2	263	4.3648
2	264	4.3855
2	265	4.36843
2	266	4.74678
2	267	4.78517
2	268	4.66771
2	269	4.70516
2	270	4.49848
2	271	4.97274
2	272	4.97274
2	273	4.9554
2	274	4.78322
2	275	4.37934
2	276	4.29663
2	277	3.77373
2	278	3.58969
2	279	3.89817
2	280	4.13495
2	281	4.15113
2	282	3.92635
2	283	3.89254
2	284	3.61528
2	285	3.7149
2	286	4.02019
2	287	4.12012
2	288	3.44714
2	289	3.19386
2	290	3.19386
2	291	3.20379
2	292	3.28937
2	293	3.77316
2	294	3.82343
2	295	3.727
2	296	3.78429
2	297	NA
2	298	NA
2	299	NA
2	300	NA
2	301	NA
2	302	NA
2	303	NA
2	304	NA
2	305	NA
2	306	NA
2	307	NA
2	308	NA
2	309	NA
2	310	NA
2	311	NA
2	312	NA
2	313	NA
2	314	NA
2	315	NA
2	316	NA
2	317	NA
2	318	NA
2	319	NA
2	320	NA
2	321	NA
2	322	NA
2	323	NA
2	324	NA
2	325	NA
2	326	NA
2	327	NA
2	328	NA
2	329	NA
2	330	NA
2	331	NA
2	332	NA
2	333	NA
2	334	NA
2	335	NA
2	336	NA
2	337	NA
2	338	1.81673
2	339	2.0057
2	340	1.95506
2	341	1.98102
2	342	1.98102
2	343	1.89779
2	344	1.86114
2	345	1.94655
2	346	1.84336
2	347	1.88561
2	348	1.90887
2	349	1.82825
2	350	1.84479
2	351	1.76967
2	352	1.75402
2	353	1.86573
2	354	1.89377
2	355	1.75835
2	356	1.78462
2	357	1.78823
2	358	1.97536
2	359	1.88033
2	360	1.86187
2	361	1.86187
2	362	1.84442
2	363	1.84693
2	364	1.88259
2	365	1.88106
2	366	2.06429
2	367	2.08315
2	368	2.01888
2	369	2.05411
2	370	2.12489
2	371	1.85549
2	372	1.79907
2	373	1.79907
2	374	1.79907
2	375	1.78777
2	376	1.78785
2	377	1.79976
2	378	1.92328
2	379	1.93088
2	380	1.99478
2	381	1.96446
2	382	1.95406
2	383	2.02526
2	384	2.02833
2	385	2.05864
2	386	1.93776
2	387	1.90411
2	388	1.97988
2	389	1.92782
2	390	2.04074
2	391	2.10377
2	392	2.13234
2	393	2.0455
2	394	1.88461
2	395	1.89682
2	396	1.95202
2	397	2.0912
2	398	2.0912
2	399	1.90128
2	400	1.94711
2	401	1.83872
2	402	1.61662
2	403	1.92281
2	404	1.91562
2	405	1.93705
2	406	1.927
2	407	2.03875
2	408	2.03243
2	409	1.91462
2	410	1.91129
2	411	1.97481
2	412	1.97485
2	413	1.95333
2	414	1.86595
2	415	1.88654
2	416	1.862
2	417	1.93715
2	418	1.91949
2	419	1.9041
2	420	1.83785
2	421	1.87603
2	422	1.97209
2	423	1.99885
2	424	1.92922
2	425	2.0097
2	426	2.12855
2	427	2.15575
2	428	2.17542
2	429	2.36874
2	430	2.1861
2	431	2.23692
2	432	2.11199
2	433	2.21096
2	434	2.03525
2	435	2.00015
2	436	1.88174
2	437	1.87392
2	438	1.91778
2	439	1.88081
2	440	1.86268
2	441	1.92009
2	442	1.94145
2	443	1.91257
2	444	1.92758
2	445	1.88022
2	446	1.85634
2	447	1.81569
2	448	1.89661
2	449	1.92553
2	450	1.923
2	451	1.86974
2	452	1.97817
2	453	2.08055
2	454	2.03318
2	455	1.95459
2	456	1.94712
2	457	1.92877
2	458	1.92059
2	459	1.8923
2	460	1.93297
2	461	2.10666
2	462	2.12137
2	463	2.1954
2	464	2.15535
2	465	2.01333
2	466	1.98913
2	467	2.09231
2	468	1.84825
2	469	1.75969
2	470	1.91446
2	471	1.96615
2	472	2.05413
2	473	2.08519
2	474	1.92047
2	475	1.86888
2	476	1.88471
2	477	1.96285
2	478	2.03816
2	479	1.96284
2	480	2.044
2	481	1.97037
2	482	1.96565
2	483	1.92055
2	484	2.01223
2	485	1.95702
2	486	1.98376
2	487	2.00818
2	488	2.09145
2	489	1.98907
2	490	1.98044
2	491	2.04701
2	492	1.9929
2	493	2.00464
2	494	1.90855
2	495	1.9089
2	496	1.92775
2	497	1.98035
2	498	1.90052
2	499	1.87605
2	500	2.02819
2	501	2.03073
2	502	1.92276
2	503	1.85318
2	504	1.89489
2	505	1.86383
2	506	1.90882
2	507	1.99529
2	508	2.00081
2	509	2.03279
2	510	2.02502
2	511	1.97382
2	512	2.04603
2	513	2.04761
2	514	2.01232
2	515	1.91233
2	516	2.02904
2	517	2.01403
2	518	2.03441
2	519	2.00261
2	520	1.97842
2	521	2.00289
2	522	2.07266
2	523	2.37034
2	524	2.62189
2	525	2.51126
2	526	2.47829
2	527	2.40901
2	528	2.39129
2	529	2.48505
2	530	2.11906
2	531	2.16869
2	532	2.20378
2	533	2.29164
2	534	2.38894
2	535	2.38551
2	536	2.3315
2	537	2.10312
2	538	2.10329
2	539	2.12926
2	540	2.08055
2	541	2.0752
2	542	2.13495
2	543	2.20498
2	544	2.26255
2	545	2.37268
2	546	2.30097
2	547	2.37767
2	548	2.37203
2	549	2.2154
2	550	2.17253
2	551	2.19984
2	552	2.20184
2	553	2.1349
2	554	2.21716
2	555	2.24889
2	556	2.31123
2	557	2.44001
2	558	2.39222
2	559	2.12794
2	560	1.98382
2	561	2.04892
2	562	2.12162
2	563	2.09222
2	564	2.1455
2	565	2.28468
2	566	2.23716
2	567	2.12499
2	568	1.97808
2	569	2.09183
2	570	2.18877
2	571	2.26176
2	572	2.46062
2	573	2.38554
2	574	2.23874
2	575	2.09354
2	576	2.10919
2	577	2.13133
2	578	2.1924
2	579	2.11056
2	580	2.04731
2	581	2.00259
2	582	2.09057
2	583	2.16208
2	584	2.24149
2	585	2.21555
2	586	2.05395
2	587	2.04733
2	588	2.19967
2	589	2.16414
2	590	1.97895
2	591	2.0892
2	592	2.0129
2	593	2.10097
2	594	2.0951
2	595	2.11619
2	596	1.92483
2	597	2.10242
2	598	2.10242
2	599	2.10459
2	600	2.37892
2	601	2.48749
2	602	2.75314
2	603	2.93889
2	604	3.2497
2	605	3.37662
2	606	3.37011
2	607	3.27589
2	608	3.05684
2	609	3.18587
2	610	3.20427
2	611	3.21393
2	612	3.49524
2	613	3.14545
2	614	2.92007
2	615	3.2831
2	616	3.21724
2	617	3.03019
2	618	3.21389
2	619	3.38681
2	620	3.53267
2	621	3.45551
2	622	3.57813
2	623	3.60246
2	624	3.55268
2	625	3.73308
2	626	3.74488
2	627	3.70097
2	628	3.4889
2	629	3.51272
2	630	3.25953
2	631	2.66517
2	632	2.80382
2	633	2.74357
2	634	3.3419
2	635	3.46705
2	636	3.23588
2	637	3.36982
2	638	3.36925
2	639	3.13055
2	640	2.95775
2	641	3.01022
2	642	2.90588
2	643	3.1961
2	644	3.37886
2	645	3.22173
2	646	3.14766
2	647	3.06033
2	648	3.06493
2	649	3.85503
2	650	4.53294
2	651	4.77352
2	652	4.86242
2	653	4.92859
2	654	4.95855
2	655	4.96119
2	656	4.89481
2	657	4.95374
2	658	5.05713
2	659	5.00544
2	660	4.93684
2	661	4.7286
2	662	4.52171
2	663	4.63554
2	664	4.97592
2	665	4.98516
2	666	4.95623
2	667	4.8191
2	668	4.73339
2	669	4.55255
2	670	4.48983
2	671	4.68149
2	672	4.74937
2	673	4.82747
2	674	4.91869
2	675	4.80471
2	676	4.49295
2	677	4.5779
2	678	4.93409
2	679	5.08659
2	680	5.03619
2	681	5.10688
2	682	5.18928
2	683	5.16886
2	684	5.01142
2	685	5.03907
2	686	5.13961
2	687	5.02885
2	688	4.66306
2	689	3.94792
2	690	3.95129
2	691	3.75598
2	692	3.67775
2	693	3.84794
2	694	4.20228
2	695	4.20865
2	696	3.98686
2	697	3.9495
2	698	3.583
2	699	3.329
2	700	3.21678
2	701	2.7932
2	702	2.61817
2	703	3.16409
2	704	3.49687
2	705	3.92235
2	706	4.22741
2	707	3.93185
2	708	3.8916
2	709	3.99176
2	710	4.06787
2	711	4.29759
2	712	4.47864
2	713	3.74263
2	714	3.26265
2	715	2.94457
2	716	2.98034
2	717	3.38667
2	718	3.76627
2	719	3.95759
2	720	3.71084
2	721	4.30316
2	722	4.55925
2	723	4.56617
2	724	4.56289
2	725	4.4404
2	726	4.69775
2	727	4.322
2	728	3.78913
2	729	4.11006
2	730	3.89814
2	731	3.90692
2	732	3.35953
2	733	2.99666
2	734	3.20301
2	735	3.77128
2	736	3.16129
2	737	3.11597
2	738	3.18749
2	739	3.44069
2	740	3.50527
2	741	2.90585
2	742	3.52198
2	743	4.10605
2	744	4.07724
2	745	3.34102
2	746	3.19917
2	747	3.8228
2	748	3.73251
2	749	3.36393
2	750	2.95109
2	751	3.20653
2	752	3.31946
2	753	3.49932
2	754	3.95237
2	755	4.33888
2	756	4.17802
2	757	3.83488
2	758	3.83104
2	759	3.84289
2	760	3.43577
2	761	3.37879
2	762	3.28911
2	763	3.69182
2	764	4.0446
2	765	3.33067
2	766	3.33067
2	767	3.33067
2	768	3.32736
2	769	3.19598
2	770	3.38022
2	771	3.92527
2	772	3.90923
2	773	3.58135
2	774	2.99464
2	775	2.59841
2	776	2.46372
2	777	2.41066
2	778	2.73609
2	779	2.98293
2	780	2.92921
2	781	3.41091
2	782	3.59842
2	783	3.56789
2	784	3.43909
2	785	3.66648
2	786	4.20788
2	787	4.33717
2	788	4.4923
2	789	4.585
2	790	4.17196
2	791	3.25408
2	792	3.1166
2	793	3.60887
2	794	3.88649
2	795	3.3166
2	796	3.14788
2	797	4.03106
2	798	4.39769
2	799	4.33152
2	800	4.02153
2	801	4.11113
2	802	3.98301
2	803	3.89934
2	804	3.95326
2	805	4.10364
2	806	4.25589
2	807	3.94179
2	808	3.7162
2	809	3.96971
2	810	3.99212
2	811	3.75971
2	812	3.70533
2	813	3.48672
2	814	2.96498
2	815	2.7306
2	816	2.9768
2	817	3.30513
2	818	3.66639
2	819	4.0532
2	820	4.08569
2	821	3.94698
2	822	4.32547
2	823	4.31362
2	824	4.01901
2	825	4.17125
2	826	4.06353
2	827	4.10772
2	828	4.16993
2	829	4.57475
2	830	4.87757
2	831	4.65357
2	832	4.36281
2	833	4.48245
2	834	4.49722
2	835	4.51508
2	836	4.39578
2	837	4.34873
2	838	4.2117
2	839	4.39169
2	840	4.62907
2	841	4.33028
2	842	3.98696
2	843	3.96453
2	844	3.63943
2	845	3.66392
2	846	3.62558
2	847	3.55561
2	848	4.03967
2	849	4.247
2	850	4.35569
2	851	4.40554
2	852	4.32947
2	853	4.29898
2	854	4.28023
2	855	3.86166
2	856	4.07978
2	857	4.17704
2	858	4.43849
2	859	4.16868
2	860	3.7201
2	861	3.14701
2	862	2.8134
2	863	2.76913
2	864	2.76069
2	865	2.60875
2	866	2.74724
2	867	2.86147
2	868	3.34018
2	869	3.39421
2	870	3.80564
2	871	4.15293
2	872	4.25128
2	873	4.42618
2	874	4.71085
2	875	4.59742
2	876	4.14144
2	877	4.05114
2	878	3.67599
2	879	3.19212
2	880	2.81681
2	881	2.52464
2	882	2.55808
2	883	2.97197
2	884	3.26972
2	885	3.08539
2	886	3.18964
2	887	3.54333
2	888	3.94226
2	889	3.84345
2	890	3.66585
2	891	2.98433
2	892	2.83666
2	893	2.78132
2	894	3.09701
2	895	3.53315
2	896	3.83488
2	897	4.12206
2	898	4.11616
2	899	4.1302
2	900	3.8642
2	901	3.69121
3	1	5.11462
3	2	4.87788
3	3	5.06562
3	4	5.30486
3	5	5.56467
3	6	5.94793
3	7	5.0981
3	8	5.58984
3	9	5.75729
3	10	5.93635
3	11	5.96384
3	12	5.78848
3	13	5.48062
3	14	5.61476
3	15	5.61476
3	16	5.61476
3	17	5.61476
3	18	5.57396
3	19	5.64178
3	20	5.95215
3	21	5.8766
3	22	5.84236
3	23	5.95917
3	24	5.83455
3	25	5.52238
3	26	5.87014
3	27	5.51035
3	28	5.85158
3	29	6.06392
3	30	5.9824
3	31	6.01877
3	32	5.92577
3	33	5.94429
3	34	5.37449
3	35	5.38084
3	36	5.62529
3	37	5.82906
3	38	5.61971
3	39	5.67479
3	40	5.54255
3	41	5.43956
3	42	5.51984
3	43	5.62035
3	44	5.82767
3	45	5.38711
3	46	5.38761
3	47	5.59122
3	48	5.99616
3	49	6.00132
3	50	5.97929
3	51	6.03313
3	52	6.08857
3	53	6.2853
3	54	5.5173
3	55	5.32998
3	56	5.30846
3	57	5.38515
3	58	5.58575
3	59	5.85186
3	60	5.98259
3	61	5.98259
3	62	5.98259
3	63	6.03454
3	64	6.17737
3	65	6.46445
3	66	6.59434
3	67	6.48513
3	68	6.46101
3	69	6.30043
3	70	6.32753
3	71	6.5323
3	72	6.60774
3	73	6.5636
3	74	6.61863
3	75	6.71601
3	76	6.58034
3	77	6.43198
3	78	6.47861
3	79	6.5155
3	80	6.29776
3	81	6.26063
3	82	6.29308
3	83	6.17604
3	84	6.53795
3	85	6.63526
3	86	6.41343
3	87	6.22118
3	88	6.23608
3	89	6.70519
3	90	6.005
3	91	6.4005
3	92	6.51351
3	93	6.48472
3	94	6.50681
3	95	6.46074
3	96	6.63497
3	97	6.60046
3	98	6.26801
3	99	6.20576
3	100	6.20576
3	101	6.20576
3	102	6.1725
3	103	6.37619
3	104	6.45428
3	105	6.44238
3	106	6.22511
3	107	6.07156
3	108	5.75131
3	109	6.00715
3	110	5.76634
3	111	5.68795
3	112	6.13723
3	113	6.23899
3	114	5.98228
3	115	6.16486
3	116	6.47891
3	117	6.45387
3	118	6.17726
3	119	6.02801
3	120	6.02801
3	121	6.02801
3	122	5.9496
3	123	5.76933
3	124	5.77606
3	125	5.83288
3	126	6.10923
3	127	6.60041
3	128	6.72602
3	129	6.74774
3	130	6.21351
3	131	6.03906
3	132	5.82198
3	133	5.24318
3	134	5.2928
3	135	5.54888
3	136	5.62106
3	137	5.81803
3	138	6.16574
3	139	6.68585
3	140	6.61546
3	141	6.53743
3	142	6.53743
3	143	6.53743
3	144	6.53743
3	145	6.53743
3	146	6.50356
3	147	6.46229
3	148	6.32044
3	149	6.25628
3	150	6.17044
3	151	6.32491
3	152	6.38295
3	153	6.4434
3	154	6.21509
3	155	6.15978
3	156	6.00102
3	157	6.26618
3	158	6.23968
3	159	6.23968
3	160	6.23968
3	161	6.20213
3	162	6.30372
3	163	6.34846
3	164	6.34846
3	165	6.34846
3	166	6.34846
3	167	6.34833
3	168	6.11823
3	169	6.01484
3	170	5.92329
3	171	6.07473
3	172	6.1658
3	173	5.98091
3	174	5.97544
3	175	5.85006
3	176	5.52821
3	177	5.82291
3	178	5.94767
3	179	5.9984
3	180	5.9347
3	181	6.14312
3	182	6.58462
3	183	6.59205
3	184	6.60701
3	185	6.7294
3	186	6.80838
3	187	6.4775
3	188	6.31031
3	189	6.45654
3	190	6.53294
3	191	6.10511
3	192	5.46337
3	193	5.46337
3	194	5.15828
3	195	5.10477
3	196	5.63793
3	197	6.07988
[truncated: 8,813 more rows]

## Sheet: Pupil diameter blue light
id	time (s)	pupil diameter (mm)
1	1	NA
1	2	NA
1	3	5.95988
1	4	5.95988
1	5	5.95988
1	6	5.95988
1	7	5.95988
1	8	5.95988
1	9	5.95988
1	10	5.95988
1	11	5.92268
1	12	5.79544
1	13	6.06166
1	14	6.06166
1	15	6.06166
1	16	6.06166
1	17	5.96238
1	18	5.20009
1	19	5.26522
1	20	5.41291
1	21	5.55631
1	22	5.46748
1	23	5.38627
1	24	4.87363
1	25	4.80677
1	26	4.80677
1	27	4.80677
1	28	4.80677
1	29	4.80677
1	30	4.80677
1	31	4.80677
1	32	4.80677
1	33	4.80677
1	34	5.17444
1	35	5.38334
1	36	5.55701
1	37	5.55701
1	38	5.55701
1	39	5.55701
1	40	5.55701
1	41	5.55701
1	42	5.07209
1	43	4.78097
1	44	4.78097
1	45	4.85627
1	46	4.73952
1	47	4.11484
1	48	4.90405
1	49	4.90405
1	50	4.90405
1	51	4.90405
1	52	5.13992
1	53	5.42565
1	54	5.80158
1	55	5.61568
1	56	5.66273
1	57	5.83092
1	58	5.83092
1	59	5.94167
1	60	6.06166
1	61	6.06166
1	62	6.06389
1	63	6.25647
1	64	6.27809
1	65	6.27809
1	66	6.27809
1	67	6.27809
1	68	6.27809
1	69	6.27809
1	70	6.28149
1	71	6.31645
1	72	6.46053
1	73	6.46425
1	74	6.7209
1	75	7.0802
1	76	7.0802
1	77	7.0802
1	78	7.0802
1	79	7.0802
1	80	7.0802
1	81	7.0802
1	82	7.0802
1	83	7.0802
1	84	7.0802
1	85	7.0802
1	86	7.0802
1	87	7.0802
1	88	7.0802
1	89	7.0802
1	90	7.0802
1	91	7.0802
1	92	7.0802
1	93	7.0802
1	94	7.0802
1	95	7.0802
1	96	7.0411
1	97	7.16033
1	98	7.28344
1	99	7.38695
1	100	7.14776
1	101	6.1766
1	102	6.1766
1	103	6.1766
1	104	6.1766
1	105	6.1766
1	106	6.1766
1	107	6.1766
1	108	6.1766
1	109	6.1766
1	110	6.1766
1	111	6.1766
1	112	6.1766
1	113	6.1766
1	114	6.1766
1	115	6.1766
1	116	6.1766
1	117	6.1766
1	118	6.1766
1	119	6.1766
1	120	6.1766
1	121	6.1766
1	122	6.1766
1	123	6.1766
1	124	6.1766
1	125	6.1766
1	126	6.1766
1	127	6.1766
1	128	6.1766
1	129	6.1766
1	130	6.1766
1	131	6.1766
1	132	6.1766
1	133	6.1766
1	134	6.1766
1	135	6.1766
1	136	6.1766
1	137	6.1766
1	138	6.1766
1	139	6.1766
1	140	6.1766
1	141	6.1766
1	142	6.1766
1	143	6.34757
1	144	6.43466
1	145	6.61218
1	146	6.60119
1	147	6.78449
1	148	6.81007
1	149	6.92012
1	150	6.79094
1	151	6.77854
1	152	6.77854
1	153	6.77854
1	154	6.77854
1	155	6.77854
1	156	6.77854
1	157	6.77854
1	158	6.77854
1	159	6.77854
1	160	6.77854
1	161	6.77854
1	162	6.77854
1	163	6.77854
1	164	6.77854
1	165	6.77854
1	166	6.77854
1	167	6.77854
1	168	6.77854
1	169	6.77854
1	170	6.77854
1	171	6.77854
1	172	6.77854
1	173	6.77854
1	174	6.77854
1	175	6.77854
1	176	6.77854
1	177	6.77383
1	178	6.92187
1	179	7.1088
1	180	7.1088
1	181	6.70166
1	182	6.57247
1	183	6.57247
1	184	6.57247
1	185	6.57247
1	186	6.57247
1	187	6.57247
1	188	6.4623
1	189	6.34193
1	190	5.37646
1	191	5.37646
1	192	5.37646
1	193	5.37646
1	194	5.37646
1	195	5.37646
1	196	5.37646
1	197	5.37646
1	198	5.37646
1	199	5.37646
1	200	5.37646
1	201	5.37646
1	202	5.37646
1	203	5.37646
1	204	5.37646
1	205	5.37646
1	206	5.37646
1	207	5.37646
1	208	5.37646
1	209	5.37646
1	210	5.37646
1	211	5.37646
1	212	5.37646
1	213	5.37646
1	214	5.37646
1	215	5.37646
1	216	5.37646
1	217	5.37646
1	218	5.37646
1	219	5.37646
1	220	5.37646
1	221	5.37646
1	222	5.37646
1	223	5.37646
1	224	5.37646
1	225	5.37646
1	226	5.37646
1	227	5.37646
1	228	5.37646
1	229	5.37646
1	230	5.37646
1	231	5.37646
1	232	5.37646
1	233	5.42678
1	234	5.68317
1	235	5.31545
1	236	5.42748
1	237	5.42748
1	238	5.4921
1	239	5.43309
1	240	5.43309
1	241	5.43309
1	242	5.43309
1	243	5.43309
1	244	5.43309
1	245	5.43309
1	246	5.43309
1	247	5.43309
1	248	5.43309
1	249	5.43309
1	250	5.43309
1	251	5.43309
1	252	5.43309
1	253	5.43309
1	254	5.43309
1	255	5.43309
1	256	5.43309
1	257	5.43309
1	258	5.43309
1	259	5.43309
1	260	5.43309
1	261	4.66263
1	262	4.23063
1	263	4.23063
1	264	4.23063
1	265	4.23063
1	266	4.23063
1	267	4.23063
1	268	4.23063
1	269	4.23063
1	270	4.23063
1	271	4.23063
1	272	4.23063
1	273	4.23063
1	274	4.23063
1	275	4.23063
1	276	4.23063
1	277	4.23063
1	278	4.23063
1	279	4.23063
1	280	4.23063
1	281	4.23063
1	282	4.23063
1	283	4.05046
1	284	4.74044
1	285	6.77125
1	286	6.77125
1	287	6.77125
1	288	6.77125
1	289	6.77125
1	290	6.77125
1	291	6.77125
1	292	6.77125
1	293	6.77125
1	294	6.77125
1	295	6.77125
1	296	6.77125
1	297	6.77125
1	298	6.77125
1	299	6.77125
1	300	6.77125
1	301	6.76835
1	302	NA
1	303	NA
1	304	NA
1	305	NA
1	306	NA
1	307	NA
1	308	NA
1	309	NA
1	310	NA
1	311	NA
1	312	NA
1	313	NA
1	314	NA
1	315	NA
1	316	NA
1	317	NA
1	318	NA
1	319	NA
1	320	NA
1	321	NA
1	322	NA
1	323	NA
1	324	NA
1	325	NA
1	326	NA
1	327	NA
1	328	NA
1	329	NA
1	330	NA
1	331	NA
1	332	NA
1	333	NA
1	334	NA
1	335	NA
1	336	NA
1	337	NA
1	338	NA
1	339	NA
1	340	NA
1	341	NA
1	342	NA
1	343	NA
1	344	NA
1	345	NA
1	346	NA
1	347	NA
1	348	NA
1	349	NA
1	350	NA
1	351	NA
1	352	NA
1	353	NA
1	354	NA
1	355	NA
1	356	NA
1	357	NA
1	358	NA
1	359	NA
1	360	NA
1	361	NA
1	362	NA
1	363	NA
1	364	NA
1	365	NA
1	366	NA
1	367	NA
1	368	NA
1	369	NA
1	370	NA
1	371	NA
1	372	NA
1	373	NA
1	374	NA
1	375	NA
1	376	NA
1	377	NA
1	378	NA
1	379	NA
1	380	NA
1	381	NA
1	382	NA
1	383	NA
1	384	NA
1	385	NA
1	386	NA
1	387	NA
1	388	NA
1	389	NA
1	390	NA
1	391	NA
1	392	NA
1	393	NA
1	394	NA
1	395	NA
1	396	NA
1	397	NA
1	398	NA
1	399	NA
1	400	NA
1	401	NA
1	402	NA
1	403	NA
1	404	NA
1	405	NA
1	406	NA
1	407	NA
1	408	NA
1	409	2.65874
1	410	2.68641
1	411	2.68641
1	412	2.68641
1	413	2.68641
1	414	2.68641
1	415	2.31204
1	416	2.34128
1	417	2.34128
1	418	2.34128
1	419	2.34128
1	420	2.34128
1	421	2.34128
1	422	2.34128
1	423	2.34128
1	424	2.34128
1	425	2.34128
1	426	2.34128
1	427	2.34128
1	428	2.34128
1	429	2.34128
1	430	2.34128
1	431	2.34128
1	432	2.34128
1	433	2.34128
1	434	2.34128
1	435	2.34128
1	436	2.34128
1	437	2.34128
1	438	2.34128
1	439	2.34128
1	440	2.34128
1	441	2.34128
1	442	2.34128
1	443	2.34128
1	444	2.34128
1	445	2.34128
1	446	2.34128
1	447	2.34128
1	448	2.34128
1	449	2.34128
1	450	2.34128
1	451	2.34128
1	452	2.34128
1	453	2.34128
1	454	2.34128
1	455	2.34128
1	456	2.34128
1	457	2.34128
1	458	2.34128
1	459	2.34128
1	460	2.34128
1	461	2.34128
1	462	2.34128
1	463	2.34128
1	464	2.34128
1	465	2.34128
1	466	2.34128
1	467	2.34128
1	468	2.34128
1	469	2.34128
1	470	2.34128
1	471	2.34128
1	472	2.34128
1	473	2.34128
1	474	2.34128
1	475	2.34128
1	476	2.34128
1	477	2.34128
1	478	2.34128
1	479	2.34128
1	480	2.34128
1	481	2.34128
1	482	2.34128
1	483	2.34128
1	484	2.34128
1	485	2.34128
1	486	2.34128
1	487	2.34128
1	488	2.34128
1	489	2.34128
1	490	2.34128
1	491	2.34128
1	492	2.26053
1	493	2.34044
1	494	2.24533
1	495	2.29625
1	496	2.27216
1	497	2.24229
1	498	2.4766
1	499	2.24194
1	500	1.85794
1	501	1.85794
1	502	1.85794
1	503	1.85794
1	504	1.85794
1	505	1.85794
1	506	1.85794
1	507	1.85794
1	508	1.85794
1	509	1.85794
1	510	1.85794
1	511	1.85794
1	512	1.85794
1	513	1.85794
1	514	1.85794
1	515	1.85794
1	516	1.85794
1	517	1.85794
1	518	1.85794
1	519	1.85794
1	520	1.85794
1	521	1.85794
1	522	1.85794
1	523	1.85794
1	524	1.85794
1	525	1.85794
1	526	1.85794
1	527	1.85794
1	528	1.85794
1	529	1.96579
1	530	2.06513
1	531	2.06513
1	532	2.06513
1	533	2.06756
1	534	2.03955
1	535	2.02083
1	536	2.02083
1	537	2.02083
1	538	2.02083
1	539	2.02083
1	540	2.02083
1	541	2.02083
1	542	2.02083
1	543	2.02083
1	544	2.02083
1	545	2.02083
1	546	2.02083
1	547	2.12759
1	548	2.36483
1	549	2.36483
1	550	2.36523
1	551	NA
1	552	NA
1	553	NA
1	554	NA
1	555	NA
1	556	NA
1	557	NA
1	558	NA
1	559	NA
1	560	NA
1	561	NA
1	562	NA
1	563	NA
1	564	NA
1	565	NA
1	566	NA
1	567	NA
1	568	NA
1	569	NA
1	570	NA
1	571	NA
1	572	NA
1	573	NA
1	574	NA
1	575	NA
1	576	NA
1	577	NA
1	578	NA
1	579	NA
1	580	NA
1	581	NA
1	582	NA
1	583	NA
1	584	NA
1	585	NA
1	586	NA
1	587	NA
1	588	NA
1	589	NA
1	590	NA
1	591	NA
1	592	NA
1	593	NA
1	594	NA
1	595	NA
1	596	NA
1	597	NA
1	598	NA
1	599	NA
1	600	NA
1	601	3.86756
1	602	3.86756
1	603	3.86756
1	604	3.86756
1	605	3.86756
1	606	3.86756
1	607	3.86756
1	608	3.86756
1	609	3.86756
1	610	3.86756
1	611	3.86756
1	612	3.86756
1	613	3.86756
1	614	3.86756
1	615	3.86756
1	616	3.86756
1	617	3.86756
1	618	3.86756
1	619	3.86756
1	620	3.86756
1	621	3.86756
1	622	3.86756
1	623	3.86756
1	624	3.86756
1	625	3.86756
1	626	3.86756
1	627	3.86756
1	628	3.86756
1	629	3.86756
1	630	3.86756
1	631	3.86756
1	632	3.86756
1	633	3.86756
1	634	3.86756
1	635	3.86756
1	636	3.86756
1	637	3.86756
1	638	3.86756
1	639	3.86756
1	640	3.86756
1	641	3.86756
1	642	3.86756
1	643	3.86756
1	644	3.86756
1	645	3.86756
1	646	3.86756
1	647	3.86756
1	648	3.86756
1	649	3.86756
1	650	3.86756
1	651	3.86756
1	652	3.86756
1	653	3.86756
1	654	3.86756
1	655	3.80144
1	656	3.91509
1	657	3.85
1	658	3.64353
1	659	3.53197
1	660	3.49953
1	661	3.52862
1	662	3.6657
1	663	4.31392
1	664	4.40445
1	665	4.40445
1	666	4.40445
1	667	4.40445
1	668	4.40445
1	669	4.40445
1	670	4.40445
1	671	4.39618
1	672	4.25606
1	673	4.12623
1	674	4.36808
1	675	4.32516
1	676	4.01356
1	677	3.81597
1	678	3.81597
1	679	3.81597
1	680	3.81597
1	681	3.81597
1	682	3.81597
1	683	3.81597
1	684	3.81597
1	685	3.81597
1	686	3.81597
1	687	3.81597
1	688	3.81597
1	689	3.81597
1	690	3.81597
1	691	3.81597
1	692	3.81597
1	693	3.81597
1	694	3.81597
1	695	3.81597
1	696	3.81597
1	697	3.81597
1	698	3.81597
1	699	3.81597
1	700	3.81597
1	701	3.81597
1	702	3.81597
1	703	3.81597
1	704	3.81597
1	705	3.81597
1	706	3.81597
1	707	3.81597
1	708	3.81597
1	709	3.81597
1	710	3.81597
1	711	3.81597
1	712	3.81597
1	713	3.81597
1	714	3.81597
1	715	3.81597
1	716	3.81597
1	717	3.81597
1	718	3.81597
1	719	3.81597
1	720	3.81597
1	721	3.81597
1	722	3.81597
1	723	3.81597
1	724	3.81597
1	725	3.81597
1	726	3.81597
1	727	3.81597
1	728	3.81597
1	729	3.81597
1	730	3.81597
1	731	3.84541
1	732	4.04671
1	733	3.50867
1	734	3.46188
1	735	3.46188
1	736	3.46188
1	737	3.46188
1	738	3.46188
1	739	3.46188
1	740	3.46188
1	741	3.46188
1	742	3.46188
1	743	3.46188
1	744	3.46188
1	745	3.46188
1	746	3.46188
1	747	3.46188
1	748	3.46188
1	749	3.46188
1	750	3.46188
1	751	3.46188
1	752	3.46188
1	753	3.46188
1	754	3.46188
1	755	3.46188
1	756	3.46188
1	757	3.46188
1	758	3.46188
1	759	3.46188
1	760	3.46188
1	761	3.46188
1	762	3.46188
1	763	3.46188
1	764	3.46188
1	765	3.46188
1	766	3.46188
1	767	3.46188
1	768	3.46188
1	769	3.46188
1	770	3.46188
1	771	3.46188
1	772	3.46188
1	773	3.46188
1	774	3.46188
1	775	3.46188
1	776	3.46188
1	777	3.46188
1	778	3.52173
1	779	3.40463
1	780	3.3045
1	781	3.80236
1	782	3.62176
1	783	3.44962
1	784	3.28189
1	785	3.28189
1	786	3.28189
1	787	3.26927
1	788	3.71237
1	789	4.13558
1	790	4.13558
1	791	4.13558
1	792	4.13558
1	793	4.13558
1	794	4.13558
1	795	4.13558
1	796	4.13558
1	797	4.13558
1	798	4.13558
1	799	4.13558
1	800	4.13558
1	801	4.13558
1	802	4.13558
1	803	4.13558
1	804	4.13558
1	805	4.13558
1	806	4.13558
1	807	4.13558
1	808	4.13558
1	809	4.13558
1	810	4.13558
1	811	4.13558
1	812	4.13558
1	813	4.13558
1	814	4.13558
1	815	4.13558
1	816	4.13558
1	817	4.13558
1	818	4.13558
1	819	4.13558
1	820	4.13558
1	821	4.13558
1	822	4.13558
1	823	4.13558
1	824	4.13558
1	825	4.13558
1	826	4.13558
1	827	4.13558
1	828	4.13558
1	829	4.13558
1	830	4.13558
1	831	4.13558
1	832	4.13558
1	833	4.13558
1	834	4.13558
1	835	4.13558
1	836	4.13558
1	837	4.13558
1	838	4.13558
1	839	4.13558
1	840	4.13558
1	841	4.13558
1	842	4.13558
1	843	4.13558
1	844	4.13558
1	845	4.13558
1	846	4.13558
1	847	4.13558
1	848	4.13076
1	849	4.04639
1	850	3.74809
1	851	3.50676
1	852	4.11668
1	853	4.99545
1	854	4.99545
1	855	4.99545
1	856	4.99545
1	857	4.99545
1	858	4.99545
1	859	4.99545
1	860	4.99545
1	861	4.99545
1	862	4.99545
1	863	4.57122
1	864	4.43725
1	865	4.43725
1	866	4.43725
1	867	4.43725
1	868	4.43725
1	869	4.43725
1	870	4.43725
1	871	4.52343
1	872	4.86592
1	873	NA
1	874	NA
1	875	NA
1	876	NA
1	877	NA
1	878	NA
1	879	NA
1	880	NA
1	881	NA
1	882	NA
1	883	NA
1	884	NA
1	885	NA
1	886	NA
1	887	NA
1	888	NA
1	889	NA
1	890	NA
1	891	NA
1	892	NA
1	893	NA
1	894	NA
1	895	NA
1	896	NA
1	897	NA
1	898	NA
1	899	NA
1	900	NA
1	901	NA
2	1	3.1094
2	2	3.07124
2	3	3.16593
2	4	3.10434
2	5	3.26401
2	6	3.38994
2	7	3.34262
2	8	3.34766
2	9	3.57534
2	10	3.60122
2	11	3.53069
2	12	3.34772
2	13	3.62673
2	14	3.32334
2	15	3.5035
2	16	3.41311
2	17	3.40949
2	18	3.14832
2	19	3.19247
2	20	3.05333
2	21	3.0191
2	22	2.68032
2	23	2.60134
2	24	2.89497
2	25	2.86301
2	26	2.71722
2	27	2.64769
2	28	2.78729
2	29	2.7342
2	30	2.93635
2	31	2.91266
2	32	2.84821
2	33	2.653
2	34	2.58764
2	35	2.59384
2	36	2.58716
2	37	2.80744
2	38	3.13389
2	39	3.20868
2	40	3.2606
2	41	3.12789
2	42	2.85653
2	43	2.93317
2	44	3.11194
2	45	3.17663
2	46	2.98576
2	47	2.99227
2	48	2.96587
2	49	2.85135
2	50	3.0276
2	51	3.21948
2	52	3.38791
2	53	3.47929
2	54	3.56807
2	55	3.63524
2	56	3.22351
2	57	3.34963
2	58	3.57376
2	59	3.50266
2	60	2.90739
2	61	2.88209
2	62	2.67674
2	63	2.82478
2	64	3.41196
2	65	3.48095
2	66	3.5484
2	67	3.57741
2	68	3.82136
2	69	3.19783
2	70	2.65227
2	71	2.75661
2	72	3.13974
2	73	3.08147
2	74	3.20886
2	75	2.82885
2	76	2.65719
2	77	2.83317
2	78	2.86103
2	79	3.11227
2	80	3.09265
2	81	3.61854
2	82	3.76523
2	83	3.69661
2	84	3.92663
2	85	3.73006
2	86	3.17466
2	87	3.05824
2	88	3.29747
2	89	3.22478
2	90	3.05399
2	91	3.22734
2	92	2.85888
2	93	3.08702
2	94	2.88539
2	95	2.78542
2	96	2.76034
2	97	3.01549
2	98	3.3866
2	99	3.48218
2	100	3.60465
2	101	3.4729
2	102	3.29378
2	103	2.91014
2	104	3.01403
2	105	3.11402
2	106	2.71173
2	107	2.92654
2	108	3.03683
2	109	2.72792
2	110	2.84305
2	111	3.05472
2	112	3.25085
2	113	3.19952
2	114	3.3279
2	115	3.36209
2	116	2.90592
2	117	2.79185
2	118	3.04527
2	119	2.81545
2	120	2.67528
2	121	2.73198
2	122	3.00625
2	123	3.01675
2	124	2.85808
2	125	2.85285
2	126	2.81094
2	127	3.0253
2	128	3.12028
2	129	3.06555
2	130	2.57876
2	131	2.70482
2	132	3.23353
2	133	3.39827
2	134	3.44777
2	135	3.17269
2	136	3.46367
2	137	3.37795
2	138	3.5291
2	139	3.40256
2	140	3.55459
2	141	3.74614
2	142	3.6752
2	143	3.78956
2	144	3.66994
2	145	3.22494
2	146	3.11921
2	147	3.01113
2	148	3.43812
2	149	3.58314
2	150	3.80816
2	151	3.66245
2	152	3.61439
2	153	2.9235
2	154	3.0172
2	155	3.08475
2	156	2.90992
2	157	3.24732
2	158	3.30401
2	159	3.07706
2	160	3.07697
2	161	2.8133
2	162	2.90111
2	163	2.97344
2	164	3.07941
2	165	3.40971
2	166	3.53958
2	167	3.45655
2	168	2.9763
2	169	3.19927
2	170	3.30143
2	171	3.53903
2	172	3.61057
2	173	3.49028
2	174	3.48107
2	175	3.03312
2	176	2.80466
2	177	2.89783
2	178	3.14972
2	179	3.40981
2	180	3.57483
2	181	2.87319
2	182	2.41113
2	183	2.37726
2	184	2.4645
2	185	2.55891
2	186	2.76263
2	187	2.79509
2	188	2.87838
2	189	2.84913
2	190	2.79072
2	191	2.79333
2	192	2.96438
2	193	3.12647
2	194	3.09135
2	195	2.64565
2	196	2.65884
2	197	2.80941
2	198	2.67842
2	199	2.69829
2	200	2.69082
2	201	2.67464
2	202	2.99685
2	203	3.03373
2	204	3.08599
2	205	2.93154
2	206	2.84773
2	207	2.94682
2	208	3.06113
2	209	2.89636
2	210	2.46212
2	211	2.53046
2	212	2.80231
2	213	2.58454
2	214	2.50286
2	215	2.54297
2	216	2.56977
2	217	2.57413
2	218	2.59134
2	219	2.7846
2	220	3.00082
2	221	3.39168
2	222	3.53115
2	223	3.75461
2	224	3.7059
2	225	3.49607
2	226	3.68968
2	227	3.56414
2	228	3.51089
2	229	3.38144
2	230	3.48212
2	231	3.57908
2	232	3.43859
2	233	2.98609
2	234	2.80601
2	235	2.69821
2	236	2.8814
2	237	3.09526
2	238	3.35959
2	239	3.57348
2	240	3.5331
2	241	3.21889
2	242	3.39913
2	243	3.54712
2	244	3.0656
2	245	2.93034
2	246	3.13333
2	247	3.13846
2	248	2.96671
2	249	2.99958
2	250	3.18129
2	251	3.23258
2	252	3.35787
2	253	3.15046
2	254	3.31147
2	255	3.04802
2	256	3.08658
2	257	3.32844
2	258	3.39662
2	259	3.48088
2	260	3.70297
2	261	3.76724
2	262	3.75494
2	263	3.85403
2	264	3.84287
2	265	3.45713
2	266	3.10378
2	267	3.34548
2	268	3.23713
2	269	3.24964
2	270	3.06247
2	271	2.9637
2	272	2.75754
2	273	2.52744
2	274	2.63229
2	275	3.08785
2	276	3.17738
2	277	2.71537
2	278	2.80612
2	279	2.63573
2	280	2.79597
2	281	3.12291
2	282	2.89162
2	283	3.19424
2	284	2.95273
2	285	3.05692
2	286	3.31372
2	287	3.02305
2	288	3.14006
2	289	3.42198
2	290	3.13778
2	291	3.02006
2	292	2.97113
2	293	2.89012
2	294	2.82857
2	295	3.08036
2	296	3.17856
2	297	3.55527
2	298	3.74258
2	299	3.8726
2	300	3.7383
2	301	3.06066
2	302	1.91345
2	303	1.91345
2	304	1.91345
2	305	1.91345
2	306	1.91345
2	307	1.91345
2	308	1.91345
2	309	1.91345
2	310	1.91345
2	311	1.91345
2	312	1.91345
2	313	1.91345
2	314	1.91345
2	315	1.91345
2	316	1.91345
2	317	1.91345
2	318	1.91345
2	319	1.91345
2	320	1.91345
2	321	1.91345
2	322	1.91345
2	323	1.91345
2	324	1.91345
2	325	1.91345
2	326	1.91345
2	327	1.91345
2	328	1.91345
2	329	1.91345
2	330	1.91345
2	331	1.91345
2	332	1.91345
2	333	1.91345
2	334	1.91345
2	335	1.91345
2	336	1.91345
2	337	1.91345
2	338	1.91345
2	339	1.91345
2	340	1.91345
2	341	1.91345
2	342	1.91345
2	343	1.91345
2	344	1.91345
2	345	1.91345
2	346	1.91345
2	347	1.91345
2	348	1.91345
2	349	1.91345
2	350	1.91345
2	351	1.91345
2	352	1.91345
2	353	1.91345
2	354	1.91345
2	355	1.91345
2	356	1.91345
2	357	1.91345
2	358	1.91345
2	359	1.91345
2	360	1.91345
2	361	1.91345
2	362	1.91345
2	363	1.91345
2	364	1.91345
2	365	1.91345
2	366	1.91345
2	367	1.91345
2	368	1.91345
2	369	1.91345
2	370	1.91345
2	371	1.91345
2	372	1.91345
2	373	1.91345
2	374	1.91345
2	375	1.91345
2	376	1.91345
2	377	1.91345
2	378	1.91345
2	379	1.91345
2	380	1.91345
2	381	1.91345
2	382	1.91345
2	383	1.91345
2	384	1.91345
2	385	1.91345
2	386	1.91345
2	387	1.91345
2	388	1.91345
2	389	1.91345
2	390	1.91345
2	391	1.91345
2	392	1.91345
2	393	1.91345
2	394	1.91345
2	395	1.91345
2	396	1.91345
2	397	1.91345
2	398	1.91345
2	399	1.91345
2	400	1.91345
2	401	1.91345
2	402	1.91345
2	403	1.91345
2	404	1.91345
2	405	1.91345
2	406	1.91345
2	407	1.91345
2	408	1.91345
2	409	1.91345
2	410	1.91345
2	411	1.91345
2	412	1.91345
2	413	1.91345
2	414	1.91345
2	415	1.74232
2	416	1.66169
2	417	1.66169
2	418	1.66169
2	419	1.66169
2	420	1.66169
2	421	1.66169
2	422	1.66169
2	423	1.66169
2	424	1.66169
2	425	1.66169
2	426	1.66169
2	427	1.66169
2	428	1.66169
2	429	1.66169
2	430	1.66169
2	431	1.66169
2	432	1.66169
2	433	1.66169
2	434	1.66169
2	435	1.66169
2	436	1.66169
2	437	1.66169
2	438	1.66169
2	439	1.66169
2	440	1.66169
2	441	1.66169
2	442	1.66169
2	443	1.66169
2	444	1.66169
2	445	1.66169
2	446	1.66169
2	447	1.66169
2	448	1.66169
2	449	1.66169
2	450	1.67611
2	451	1.72225
2	452	1.72225
2	453	1.72225
2	454	1.66318
2	455	1.65805
2	456	1.65805
2	457	1.65805
2	458	1.65805
2	459	1.65805
2	460	1.65805
2	461	1.65805
2	462	1.65805
2	463	1.41773
2	464	1.30479
2	465	1.30479
2	466	1.30479
2	467	1.30479
2	468	1.30479
2	469	1.30479
2	470	1.30479
2	471	1.30479
2	472	1.30479
2	473	1.30479
2	474	1.30479
2	475	1.30479
2	476	1.30479
2	477	1.30479
2	478	1.30479
2	479	1.30479
2	480	1.30479
2	481	1.30479
2	482	1.30479
2	483	1.30479
2	484	1.30479
2	485	1.30479
2	486	1.79356
2	487	1.83579
2	488	1.83579
2	489	1.83579
2	490	1.83579
2	491	1.83579
2	492	1.83579
2	493	1.83579
2	494	1.83579
2	495	1.83579
2	496	1.83579
2	497	1.83579
2	498	1.83579
2	499	1.83579
2	500	1.83579
2	501	1.83579
2	502	1.83579
2	503	1.83579
2	504	1.83579
2	505	1.83579
2	506	1.83579
2	507	1.83579
2	508	1.83579
2	509	1.83579
2	510	1.76482
2	511	1.68192
2	512	1.72169
2	513	1.72169
2	514	1.72169
2	515	1.72169
2	516	1.72169
2	517	1.72169
2	518	1.72169
2	519	1.72169
2	520	1.72169
2	521	1.72169
2	522	1.72169
2	523	1.72169
2	524	1.72169
2	525	1.72169
2	526	1.72169
2	527	1.72169
2	528	1.72169
2	529	1.72169
2	530	1.72169
2	531	1.78891
2	532	1.80972
2	533	1.80972
2	534	1.78465
2	535	1.7722
2	536	1.65836
2	537	1.52263
2	538	1.52263
2	539	1.52263
2	540	1.52263
2	541	1.52263
2	542	1.52263
2	543	1.52263
2	544	1.52263
2	545	1.52263
2	546	1.52263
2	547	1.52263
2	548	1.52263
2	549	1.52263
2	550	1.52263
2	551	1.52263
2	552	1.52263
2	553	1.52263
2	554	1.52263
2	555	1.52263
2	556	1.52263
2	557	1.52263
2	558	1.52263
2	559	1.52263
2	560	1.52263
2	561	1.52263
2	562	1.52263
2	563	1.52044
2	564	1.65861
2	565	1.65861
2	566	1.65861
2	567	1.65861
2	568	1.65861
2	569	1.65861
2	570	1.65861
2	571	1.65861
2	572	1.63527
2	573	1.56209
2	574	1.50869
2	575	1.54576
2	576	1.65816
2	577	1.83019
2	578	1.57774
2	579	1.52234
2	580	1.63994
2	581	1.54352
2	582	1.6139
2	583	1.623
2	584	1.61231
2	585	1.80467
2	586	1.68221
2	587	1.57644
2	588	1.56967
2	589	1.6508
2	590	1.61069
2	591	1.56584
2	592	1.55852
2	593	1.55456
2	594	1.38509
2	595	1.63244
2	596	1.57439
2	597	1.57743
2	598	1.55221
2	599	1.56905
2	600	1.64883
2	601	1.69929
2	602	1.99162
2	603	2.22163
2	604	2.22338
2	605	2.20812
2	606	2.24816
2	607	2.22738
2	608	2.33742
2	609	2.41895
2	610	2.38966
2	611	2.46983
2	612	2.49629
2	613	2.58585
2	614	2.43982
2	615	2.09091
2	616	2.16123
2	617	2.44378
2	618	2.47733
2	619	2.62702
2	620	2.6636
2	621	2.63922
2	622	2.44429
2	623	2.50876
2	624	2.30977
2	625	2.30758
2	626	2.38411
2	627	2.29932
2	628	2.39393
2	629	2.28678
2	630	2.26321
2	631	2.19775
2	632	2.16662
2	633	2.11199
2	634	2.10155
2	635	2.31204
2	636	2.21903
2	637	2.0901
2	638	2.11525
2	639	2.24117
2	640	2.14459
2	641	2.12433
2	642	2.24141
2	643	2.12394
2	644	2.18853
2	645	2.12472
2	646	2.13857
2	647	2.13762
2	648	2.33562
2	649	2.41912
2	650	2.40796
2	651	2.3104
2	652	2.34762
2	653	2.39277
2	654	2.45349
2	655	2.62396
2	656	2.65228
2	657	2.77368
2	658	2.7396
2	659	2.72385
2	660	2.76801
2	661	2.7687
2	662	2.86286
2	663	2.62063
2	664	2.55269
2	665	2.55128
2	666	2.57648
2	667	2.5734
2	668	2.68357
2	669	2.8873
2	670	2.76826
2	671	2.75947
2	672	2.68838
2	673	2.70326
2	674	2.64749
2	675	2.46914
2	676	2.35262
2	677	2.37823
2	678	2.31884
2	679	2.41988
2	680	2.50894
2	681	2.40212
2	682	2.41163
2	683	2.36671
2	684	2.45863
2	685	2.65553
2	686	2.60999
2	687	2.52512
2	688	2.33073
2	689	2.47387
2	690	2.34809
2	691	2.36515
2	692	2.52321
2	693	2.61088
2	694	2.71582
2	695	2.42294
2	696	2.51701
2	697	2.66804
2	698	2.65156
2	699	2.67494
2	700	2.53378
2	701	2.48223
2	702	2.60909
2	703	2.58832
2	704	2.52447
2	705	2.52342
2	706	2.50652
2	707	2.35213
2	708	2.28956
2	709	2.38339
2	710	2.48891
2	711	2.46046
2	712	2.47497
2	713	2.40667
2	714	2.36195
2	715	2.58771
2	716	2.87073
2	717	3.08205
2	718	3.11402
2	719	3.06033
2	720	2.97924
2	721	3.00863
2	722	2.44847
2	723	2.59366
2	724	2.79069
2	725	2.74489
2	726	2.665
2	727	2.6189
2	728	2.64295
2	729	2.72074
2	730	2.86662
2	731	2.7958
2	732	2.48603
2	733	2.37487
2	734	2.41866
2	735	2.50821
2	736	2.58675
2	737	2.47674
2	738	2.42211
2	739	2.4805
2	740	2.4974
2	741	2.20995
2	742	2.10936
2	743	2.21911
2	744	2.12633
2	745	2.10902
2	746	2.31096
2	747	2.4364
2	748	2.68892
2	749	2.58346
2	750	2.44811
2	751	2.38774
2	752	2.2395
2	753	2.2654
2	754	2.25707
2	755	2.43442
2	756	2.88704
2	757	2.98644
2	758	2.71684
2	759	2.4509
2	760	2.51233
2	761	2.55715
2	762	2.44968
2	763	2.34197
2	764	2.21661
2	765	2.50871
2	766	2.85896
2	767	2.93164
2	768	2.75355
2	769	2.59225
2	770	2.33324
2	771	2.39355
2	772	2.56534
2	773	2.47544
2	774	2.52449
2	775	2.63866
2	776	2.5711
2	777	2.56315
2	778	2.53395
2	779	2.63558
2	780	2.80704
2	781	2.81441
2	782	2.68321
2	783	2.57759
2	784	2.59813
2	785	2.44416
2	786	2.68683
2	787	2.61331
2	788	2.72708
2	789	2.6855
2	790	2.64976
2	791	2.70523
2	792	2.90538
2	793	3.06988
2	794	3.21154
2	795	3.23117
2	796	3.09765
2	797	2.83836
2	798	2.96792
2	799	3.04509
2	800	3.23443
2	801	3.23829
2	802	3.08098
2	803	3.10972
2	804	3.37887
2	805	3.526
2	806	3.6031
2	807	3.46031
2	808	3.30406
2	809	3.47246
2	810	3.46887
2	811	3.22088
2	812	3.09142
2	813	3.0922
2	814	3.26243
2	815	3.37048
2	816	3.36009
2	817	3.42145
2	818	3.34042
2	819	3.05714
2	820	3.09308
2	821	3.1518
2	822	3.17055
2	823	3.21082
2	824	3.09784
2	825	2.70068
2	826	2.63763
2	827	2.69358
2	828	2.60238
2	829	2.53085
2	830	2.54353
2	831	2.64973
2	832	2.75822
2	833	2.84536
2	834	2.82198
2	835	2.77465
2	836	2.83501
2	837	2.95441
2	838	2.96232
2	839	2.99288
2	840	2.92706
2	841	2.80917
2	842	2.62147
2	843	2.76566
2	844	2.70963
2	845	2.85462
2	846	2.72853
2	847	2.62051
2	848	2.53754
2	849	2.53502
2	850	2.53254
2	851	2.55865
2	852	2.72788
2	853	2.91504
2	854	3.10719
2	855	3.34198
2	856	3.34615
2	857	2.86871
2	858	2.40647
2	859	2.36313
2	860	2.45369
2	861	2.45095
2	862	2.25056
2	863	2.16744
2	864	2.22451
2	865	2.4386
2	866	2.55698
2	867	2.43988
2	868	2.66567
2	869	2.65588
2	870	2.76122
2	871	2.95021
2	872	2.80359
2	873	2.6522
2	874	2.6522
2	875	2.6522
2	876	2.6522
2	877	2.66679
2	878	2.52164
2	879	2.72446
2	880	2.53758
2	881	2.39655
2	882	2.24305
2	883	2.2525
2	884	2.29944
2	885	2.35308
2	886	2.37434
2	887	2.46905
2	888	2.50664
2	889	2.54719
2	890	2.41417
2	891	2.46981
2	892	2.47312
2	893	2.46188
2	894	2.67054
2	895	2.78223
2	896	2.74463
2	897	2.48186
2	898	2.77987
2	899	2.80884
2	900	2.95752
2	901	2.94737
3	1	4.96299
3	2	4.99953
3	3	4.86513
3	4	5.14795
3	5	5.17537
3	6	5.06253
3	7	5.2108
3	8	5.2463
3	9	5.62494
3	10	5.41944
3	11	5.24792
3	12	5.18528
3	13	5.38844
3	14	5.46266
3	15	5.55549
3	16	5.26116
3	17	5.08258
3	18	5.28701
3	19	5.13752
3	20	5.21189
3	21	5.22443
3	22	4.9504
3	23	4.67051
3	24	4.58849
3	25	4.46003
3	26	4.69307
3	27	4.94845
3	28	5.01983
3	29	5.12598
3	30	5.16609
3	31	5.23431
3	32	5.28882
3	33	5.10952
3	34	5.15992
3	35	5.68518
3	36	5.83372
3	37	5.83372
3	38	5.91689
3	39	5.73093
3	40	5.72928
3	41	5.80555
3	42	5.5884
3	43	5.50431
3	44	5.57177
3	45	5.97009
3	46	5.92816
3	47	5.94113
3	48	5.90794
3	49	5.41989
3	50	4.95517
3	51	4.85023
3	52	5.71097
3	53	5.83625
3	54	5.81822
3	55	5.78029
3	56	5.76743
3	57	5.61059
3	58	5.76764
3	59	5.7779
3	60	5.53512
3	61	5.61831
3	62	5.70437
3	63	5.63537
3	64	5.87833
3	65	6.10823
3	66	6.46404
3	67	6.39644
3	68	6.31692
3	69	6.04584
3	70	5.91081
3	71	6.03214
3	72	6.04371
3	73	5.90092
3	74	5.61914
3	75	5.64399
3	76	5.88881
3	77	6.13255
3	78	5.98395
3	79	6.02605
3	80	6.25857
3	81	6.26292
3	82	5.87607
3	83	6.01238
3	84	6.33263
3	85	6.31912
3	86	6.25832
3	87	6.35012
3	88	6.48154
3	89	6.39065
3	90	6.4826
3	91	6.53175
3	92	6.49553
3	93	6.42091
3	94	6.62206
3	95	6.5467
3	96	6.59729
3	97	6.56219
3	98	6.43197
3	99	6.39898
3	100	6.43157
3	101	6.48195
3	102	6.58198
3	103	6.47761
3	104	6.46651
3	105	6.48289
3	106	6.45001
3	107	6.45418
3	108	6.40048
3	109	6.31964
3	110	6.30977
3	111	6.31158
3	112	6.38592
3	113	6.44496
3	114	6.39725
3	115	6.42542
3	116	6.36083
3	117	6.38513
3	118	6.28364
3	119	6.40251
3	120	6.3153
3	121	6.20282
3	122	6.35004
3	123	6.43792
3	124	6.62104
3	125	6.53911
3	126	6.51776
3	127	6.53201
3	128	6.33857
3	129	6.5626
3	130	6.55677
3	131	6.55677
3	132	6.56925
3	133	6.53616
3	134	6.39917
3	135	6.36545
3	136	6.51464
3	137	6.4185
3	138	6.31202
3	139	6.31222
3	140	6.43018
3	141	6.32832
3	142	6.27305
3	143	6.27305
3	144	6.27305
3	145	6.27305
3	146	6.27305
3	147	6.28515
3	148	6.28849
3	149	6.25319
3	150	6.36033
3	151	6.37099
3	152	6.29845
3	153	6.44626
3	154	6.22665
3	155	6.28703
3	156	6.1908
3	157	6.17275
3	158	6.17408
3	159	6.16139
3	160	6.32136
3	161	6.40061
3	162	6.40061
3	163	6.40061
3	164	6.40061
3	165	6.40061
3	166	6.29112
3	167	6.17688
3	168	6.17688
3	169	6.35794
3	170	6.38698
3	171	6.33024
3	172	6.33024
3	173	6.33024
3	174	6.33024
3	175	6.33024
3	176	6.33024
3	177	6.03446
3	178	6.03446
3	179	6.03446
3	180	6.03446
3	181	6.03446
3	182	6.03446
3	183	6.03446
3	184	6.03446
3	185	6.43088
3	186	6.46933
3	187	6.21428
3	188	6.1124
3	189	6.11238
3	190	6.11212
3	191	6.11212
3	192	6.11212
3	193	6.11212
3	194	6.11212
3	195	6.11212
3	196	6.11212
3	197	6.11212
[truncated: 8,813 more rows]

## Sheet: Participant characteristics
id	sex	age (y)
1	male	23
2	female	23
3	male	24
4	female	22
5	male	27
6	female	26
7	male	28
8	female	21
9	male	23
10	female	24
11	male	25
12	female	25
